# Supplementary material
Source: HighWire-hosted journal article supplement (https://bmjopenquality.bmj.com/content/12/3/e002340)
Supplement: inline-supplementary-material-3 [file inline-supplementary-material-3.pdf]

## Supplementary tables S1 and S2

**Table S1.** Number and percentage of participants responding to post-training questionnaire statements on relevance and helpfulness of the training for anticipating, identifying and management impacted fetal head (IFH).

|                                                                                                                   | Strongly agree | Agree    | Somewhat agree | Neither agree nor disagree | Somewhat disagree | Disagree | Strongly disagree |
|-------------------------------------------------------------------------------------------------------------------|----------------|----------|----------------|----------------------------|-------------------|----------|-------------------|
| This training was relevant to my clinical practice in relation to managing IFH at caesarean section               | 45 (79%)       | 11 (19%) | 1 (2%)         | 0 (0%)                     | 0 (0%)            | 0 (0%)   | 0 (0%)            |
| The training will help to improve outcomes following IFH at caesarean section                                     | 41 (72%)       | 14 (25%) | 1 (2%)         | 1 (2%)                     | 0 (0%)            | 0 (0%)   | 0 (0%)            |
| The training will help maternity staff better manage IFH at caesarean section                                     | 48 (84%)       | 7 (12%)  | 1 (2%)         | 0 (0%)                     | 0 (0%)            | 1 (2%)   | 0 (2%)            |
| The simulations helped my learning in the management of IFH at caesarean section                                  | 49 (86%)       | 8 (14%)  | 0 (0%)         | 0 (0%)                     | 0 (0%)            | 0 (0%)   | 0 (0%)            |
| The use of augmented reality helped my learning in managing IFH at caesarean section                              | 27 (47%)       | 13 (23%) | 11 (19%)       | 4 (7%)                     | 2 (4%)            | 0 (0%)   | 0 (0%)            |
| The animated video helped my learning in managing IFH at caesarean section                                        | 42 (74%)       | 13 (23%) | 2 (4%)         | 0 (0%)                     | 0 (0%)            | 0 (0%)   | 0 (0%)            |
| The management algorithms will support my clinical practice or participation in managing IFH at caesarean section | 29 (51%)       | 26 (46%) | 2 (4%)         | 0 (0%)                     | 0 (0%)            | 0 (0%)   | 0 (0%)            |
| This training overall will improve my clinical practice or participation in managing IFH at caesarean section     | 44 (77%)       | 12 (21%) | 0 (0%)         | 1 (2%)                     | 0 (0%)            | 0 (0%)   | 0 (0%)            |

**Table S2.** Number and percentage of participants responding to pre-training and post-training questionnaire statements on confidence in knowledge and relating to anticipating, identifying and management impacted fetal head (IFH).

|                                                                                                                                         | Strongly agree | Agree    | Somewhat agree | Neither agree nor disagree | Somewhat disagree | Disagree | Strongly disagree | Mean* | Post-pre mean* |
|-----------------------------------------------------------------------------------------------------------------------------------------|----------------|----------|----------------|----------------------------|-------------------|----------|-------------------|-------|----------------|
| I feel confident about performing vaginal disimpaction ("push-up") (obstetricians and midwives only, n=46)                              |                |          |                |                            |                   |          |                   |       |                |
| Pre                                                                                                                                     | 2 (4%)         | 18 (39%) | 7 (15%)        | 8 (17%)                    | 4 (9%)            | 7 (15%)  | 0 (0%)            | 4.67  |                |
| Post                                                                                                                                    | 22 (48%)       | 22 (48%) | 2 (4%)         | 0 (0%)                     | 0 (0%)            | 0 (0%)   | 0 (0%)            | 6.43  | +1.76          |
| I feel confident about diagnosing an IFH at caesarean section (obstetricians only, n=25)                                                |                |          |                |                            |                   |          |                   |       |                |
| Pre                                                                                                                                     | 10 (40%)       | 13 (52%) | 2 (8%)         | 0 (0%)                     | 0 (0%)            | 0 (0%)   | 0 (0%)            | 6.32  |                |
| Post                                                                                                                                    | 16 (64%)       | 9 (36%)  | 0 (0%)         | 0 (0%)                     | 0 (0%)            | 0 (0%)   | 0 (0%)            | 6.64  | +0.32          |
| I feel confident about performing reverse breech extraction (obstetricians only, n=25)                                                  |                |          |                |                            |                   |          |                   |       |                |
| Pre                                                                                                                                     | 4 (16%)        | 11 (44%) | 4 (16%)        | 3 (12%)                    | 2 (8%)            | 1 (4%)   | 0 (0%)            | 5.32  |                |
| Post                                                                                                                                    | 9 (36%)        | 14 (56%) | 2 (8%)         | 0 (0%)                     | 0 (0%)            | 0 (0%)   | 0 (0%)            | 6.28  | +0.96          |
| I feel confident about how to manage a situation in which an IFH at caesarean section is anticipated (all participants, n=57)           |                |          |                |                            |                   |          |                   |       |                |
| Pre                                                                                                                                     | 4 (7%)         | 22 (39%) | 13 (23%)       | 8 (14%)                    | 2 (4%)            | 6 (11%)  | 2 (4%)            | 4.86  |                |
| Post                                                                                                                                    | 30 (53%)       | 25 (44%) | 2 (4%)         | 0 (0%)                     | 0 (0%)            | 0 (0%)   | 0 (0%)            | 6.49  | +1.63          |
| I feel confident that everyone in the clinical team knows when an IFH at caesarean section has been identified (all participants, n=57) |                |          |                |                            |                   |          |                   |       |                |
| Pre                                                                                                                                     | 3 (5%)         | 7 (12%)  | 14 (25%)       | 10 (18%)                   | 14 (25%)          | 8 (14%)  | 1 (2%)            | 4.07  |                |
| Post                                                                                                                                    | 20 (35%)       | 24 (42%) | 11 (19%)       | 2 (4%)                     | 0 (0%)            | 0 (0%)   | 0 (0%)            | 6.08  | +2.01          |

| I feel confident that everyone in the clinical team will know exactly what to do in the event of an IFH at caesarean section (all participants, n=57)      |          |          |          |          |          |          |        |  |      |       |
|------------------------------------------------------------------------------------------------------------------------------------------------------------|----------|----------|----------|----------|----------|----------|--------|--|------|-------|
| Pre                                                                                                                                                        | 0 (0%)   | 3 (5%)   | 15 (26%) | 7 (12%)  | 19 (33%) | 11 (19%) | 2 (4%) |  | 3.54 |       |
| Post                                                                                                                                                       | 18 (32%) | 28 (49%) | 8 (14%)  | 2 (4%)   | 1 (2%)   | 0 (0%)   | 0 (0%) |  | 6.05 | +2.51 |
| I feel confident about my own role in the management of IFH at caesarean section (all participants, n=57)                                                  |          |          |          |          |          |          |        |  |      |       |
| Pre                                                                                                                                                        | 9 (16%)  | 21 (37%) | 10 (18%) | 10 (18%) | 4 (7%)   | 1 (2%)   | 2 (4%) |  | 5.17 |       |
| Post                                                                                                                                                       | 42 (74%) | 14 (25%) | 0 (0%)   | 1 (2%)   | 0 (0%)   | 0 (0%)   | 0 (0%) |  | 6.70 | +1.53 |
| I feel confident that communication between members of the clinical team during the obstetric emergency of an IFH will be optimal (all participants, n=57) |          |          |          |          |          |          |        |  |      |       |
| Pre                                                                                                                                                        | 3 (5%)   | 8 (14%)  | 23 (40%) | 8 (14%)  | 10 (18%) | 4 (7%)   | 1 (2%) |  | 4.47 |       |
| Post                                                                                                                                                       | 24 (42%) | 25 (44%) | 6 (11%)  | 2 (4%)   | 0 (0%)   | 0 (0%)   | 0 (0%) |  | 6.24 | +1.77 |
| I feel confident about communicating with the person in labour and their birth partner about IFH at caesarean section (all participants, n=57)             |          |          |          |          |          |          |        |  |      |       |
| Pre                                                                                                                                                        | 3 (5%)   | 20 (35%) | 16 (28%) | 5 (9%)   | 9 (16%)  | 3 (5%)   | 1 (2%) |  | 4.82 |       |
| Post                                                                                                                                                       | 28 (49%) | 26 (46%) | 3 (5%)   | 0 (0%)   | 0 (0%)   | 0 (0%)   | 0 (0%) |  | 6.43 | +1.61 |

\*Mean calculated based on the following replacements: strongly agree = 7, agree = 6, somewhat agree = 5, neither agree nor disagree = 4, somewhat disagree = 3, disagree = 2, strongly disagree = 1.
